# Supplementary material for: Surface ligand length influences kinetics of H-atom uptake in polyoxovanadate-alkoxide clusters
Source: Royal Society of Chemistry journal article supplement (doi:10.1039/d3dt02074f), 2023-01-01
Supplement: d3dt02074f1.pdf [file d3dt02074f1.pdf]

Electronic Supporting Information File

**Surface Ligand Length Influences Kinetics of H-atom Uptake in  
Polyoxovanadate-alkoxide Clusters**

*Chari Y. M. Peter, Eric Schreiber, Kathryn R. Proe, and Ellen M. Matson\**

Department of Chemistry, University of Rochester, Rochester, New York 14627, United States

**Supporting Information Table of Contents:**

|                                                                                                                                                                                                                                                                               |     |
|-------------------------------------------------------------------------------------------------------------------------------------------------------------------------------------------------------------------------------------------------------------------------------|-----|
| <b>Figure S1.</b> $^1\text{H}$ NMR spectrum [ $^n\text{Oct}_4\text{N}$ ][ $\text{V}_6\text{O}_7(\text{OCH}_3)_{12}$ ] in $\text{CD}_3\text{CN}$ at $21\text{ }^\circ\text{C}$ .....                                                                                           | S3  |
| <b>Figure S2.</b> Electronic absorption spectrum of [ $^n\text{Oct}_4\text{N}$ ][ $\text{V}_6\text{O}_7(\text{OCH}_3)_{12}$ ] in THF $21\text{ }^\circ\text{C}$ .....                                                                                                         | S3  |
| <b>Figure S3.</b> ESI-MS(-ve) spectrum of <b>1-butyl</b> .....                                                                                                                                                                                                                | S4  |
| <b>Figure S4.</b> Electronic absorption spectra of <b>2-methyl</b> , <b>2-ethyl</b> , <b>2-propyl</b> and <b>2-butyl</b> in acetonitrile at $21\text{ }^\circ\text{C}$ .....                                                                                                  | S4  |
| <b>Figure S5.</b> $^1\text{H}$ NMR spectra of equilibrium reaction solutions with <b>1-methyl</b> and Hydz after 7 days in $\text{CD}_3\text{CN}$ at $21\text{ }^\circ\text{C}$ .....                                                                                         | S5  |
| <b>Table S1.</b> $\text{BDFE}(\text{O-H})_{\text{adj}}$ calculated from equilibrium reactions of <b>1-methyl</b> with Hydz after 7 days using the equation outlined in the Experimental section .....                                                                         | S5  |
| <b>Figure S6.</b> $^1\text{H}$ NMR spectra of equilibrium reaction solutions with <b>1-ethyl</b> and Hydz after 7 days in $\text{CD}_3\text{CN}$ at $21\text{ }^\circ\text{C}$ .....                                                                                          | S6  |
| <b>Table S2.</b> $\text{BDFE}(\text{O-H})_{\text{adj}}$ calculated from equilibrium reactions of <b>1-ethyl</b> with Hydz after 7 days using the equation outlined in the Experimental section .....                                                                          | S6  |
| <b>Figure S7.</b> $^1\text{H}$ NMR spectra of equilibrium reaction solutions with <b>1-propyl</b> and Hydz after 7 days in $\text{CD}_3\text{CN}$ at $21\text{ }^\circ\text{C}$ .....                                                                                         | S7  |
| <b>Table S3.</b> $\text{BDFE}(\text{O-H})_{\text{adj}}$ calculated from equilibrium reactions of <b>1-propyl</b> with Hydz after 7 days using the equation outlined in the Experimental section .....                                                                         | S7  |
| <b>Figure S8.</b> $^1\text{H}$ NMR spectra of equilibrium reaction solutions with <b>1-butyl</b> and Hydz after 7 days in $\text{CD}_3\text{CN}$ at $21\text{ }^\circ\text{C}$ .....                                                                                          | S8  |
| <b>Table S4.</b> $\text{BDFE}(\text{O-H})_{\text{adj}}$ calculated from equilibrium reactions of <b>1-butyl</b> with Hydz after 7 days using the equation outlined in the Experimental section .....                                                                          | S8  |
| <b>Figure S9.</b> Scanning kinetics (full absorption spectra) of the reaction of <b>1-methyl</b> with $\text{H}_2\text{Phen}$ collected in acetonitrile at $25\text{ }^\circ\text{C}$ .....                                                                                   | S9  |
| <b>Figure S10.</b> Plots of absorbance at $1025\text{ nm}$ vs. time for the reaction between <b>1-methyl</b> ( $0.6\text{ mM}$ ) and excess $\text{H}_2\text{Phen}$ under pseudo first-order reaction conditions recorded in acetonitrile at $25\text{ }^\circ\text{C}$ ..... | S9  |
| <b>Figure S11.</b> Scanning kinetics (full absorption spectra) of the reaction of <b>1-ethyl</b> with $\text{H}_2\text{Phen}$ collected in acetonitrile at $25\text{ }^\circ\text{C}$ .....                                                                                   | S10 |
| <b>Figure S12.</b> Plots of absorbance at $1025\text{ nm}$ vs. time for the reaction between <b>1-ethyl</b> ( $0.6\text{ mM}$ ) and excess $\text{H}_2\text{Phen}$ under pseudo first-order reaction conditions recorded in acetonitrile at $25\text{ }^\circ\text{C}$ .....  | S10 |
| <b>Figure S13.</b> Scanning kinetics (full absorption spectra) of the reaction of <b>1-propyl</b> with $\text{H}_2\text{Phen}$ collected in acetonitrile at $25\text{ }^\circ\text{C}$ .....                                                                                  | S11 |
| <b>Figure S14.</b> Plots of absorbance at $1025\text{ nm}$ vs. time for the reaction between <b>1-propyl</b> ( $0.6\text{ mM}$ ) and excess $\text{H}_2\text{Phen}$ under pseudo first-order reaction conditions recorded in acetonitrile at $25\text{ }^\circ\text{C}$ ..... | S11 |
| <b>Figure S15.</b> Scanning kinetics (full absorption spectra) of the reaction of <b>1-butyl</b> with $\text{H}_2\text{Phen}$ collected in acetonitrile at $25\text{ }^\circ\text{C}$ .....                                                                                   | S12 |

|                                                                                                                                                                                                                                  |     |
|----------------------------------------------------------------------------------------------------------------------------------------------------------------------------------------------------------------------------------|-----|
| <b>Figure S16.</b> Plots of absorbance at 1025 nm vs. time for the reaction between <b>1-butyl</b> (0.6 mM) and excess H <sub>2</sub> Phen under pseudo first-order reaction conditions recorded in acetonitrile at 25 °C. ....  | S12 |
| <b>Figure S17.</b> Plots of absorbance at 1025 nm vs. time for the reaction between <b>1-methyl</b> (0.6 mM) and excess D <sub>2</sub> Phen under pseudo first-order reaction conditions recorded in acetonitrile at 25 °C. .... | S13 |
| <b>Figure S18.</b> Plots of absorbance at 1025 nm vs. time for the reaction between <b>1-ethyl</b> (0.6 mM) and excess D <sub>2</sub> Phen under pseudo first-order reaction conditions recorded in acetonitrile at 25 °C. ....  | S13 |
| <b>Figure S19.</b> Plots of absorbance at 1025 nm vs. time for the reaction between <b>1-propyl</b> (0.6 mM) and excess D <sub>2</sub> Phen under pseudo first-order reaction conditions recorded in acetonitrile at 25 °C. .... | S14 |
| <b>Figure S20.</b> Plots of absorbance at 1025 nm vs. time for the reaction between <b>1-butyl</b> (0.6 mM) and excess D <sub>2</sub> Phen under pseudo first-order reaction conditions recorded in acetonitrile at 25 °C. ....  | S14 |
| <b>Figure S21.</b> Plots of absorbance at 1025 nm vs. time for the reaction between <b>1-methyl</b> (0.6 mM) and H <sub>2</sub> Phen (8 mM) recorded in acetonitrile between 0 °C and 35 °C .....                                | S15 |
| <b>Figure S22.</b> Plots of absorbance at 1025 nm vs. time for the reaction between <b>1-ethyl</b> (0.6 mM) and H <sub>2</sub> Phen (8 mM) recorded in acetonitrile between 10 °C and 45 °C .....                                | S15 |
| <b>Figure S23.</b> Plots of absorbance at 1025 nm vs. time for the reaction between <b>1-propyl</b> (0.6 mM) and H <sub>2</sub> Phen (8 mM) recorded in acetonitrile between 10 °C and 45 °C .....                               | S16 |
| <b>Figure S24.</b> Plots of absorbance at 1025 nm vs. time for the reaction between <b>1-butyl</b> (0.6 mM) and H <sub>2</sub> Phen (8 mM) recorded in acetonitrile between 10 °C and 45 °C .....                                | S16 |

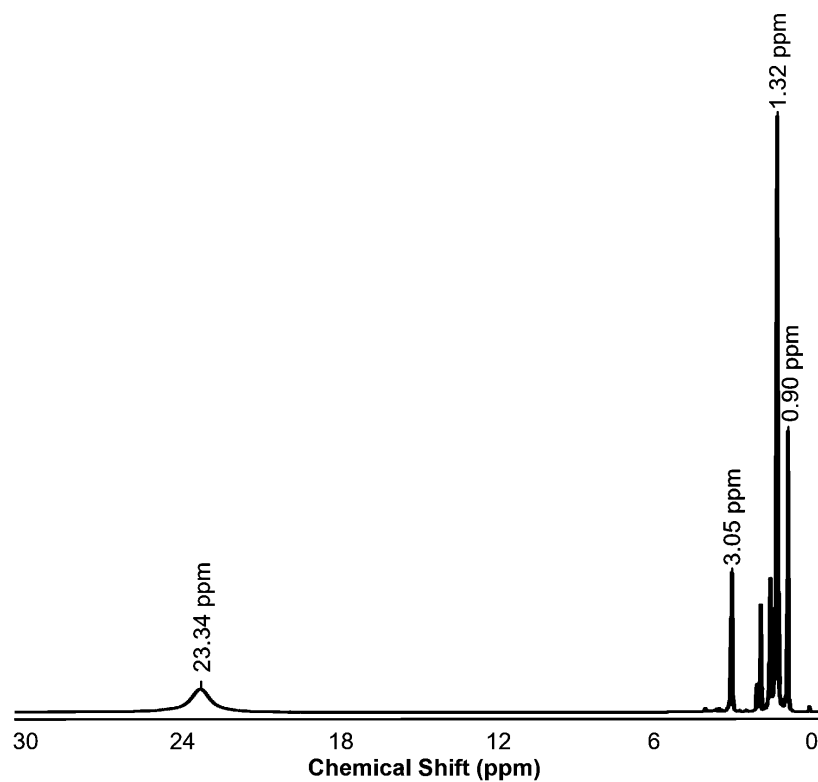

**Figure S1.** <sup>1</sup>H NMR spectrum [*n*Oct<sub>4</sub>N][V<sub>6</sub>O<sub>7</sub>(OCH<sub>3</sub>)<sub>12</sub>] in CD<sub>3</sub>CN at 21 °C.

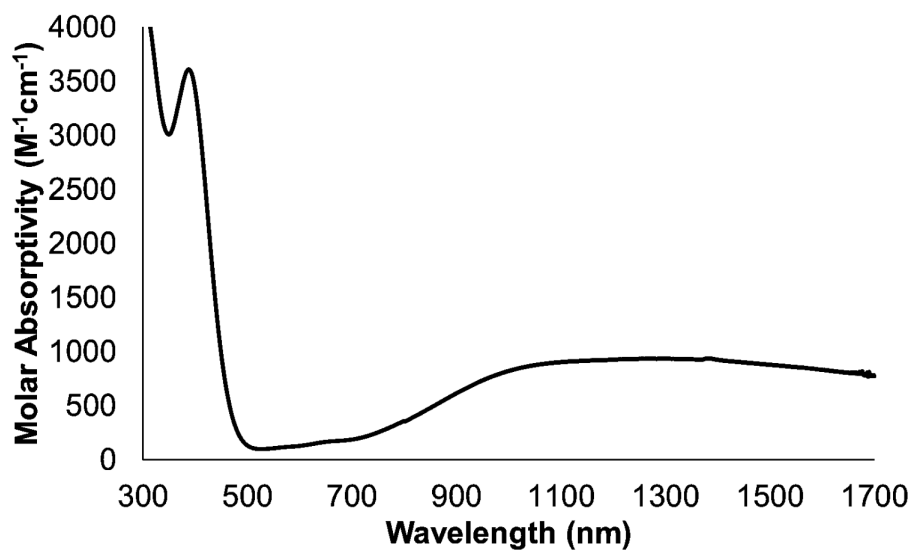

**Figure S2.** Electronic absorption spectrum of [*n*Oct<sub>4</sub>N][V<sub>6</sub>O<sub>7</sub>(OCH<sub>3</sub>)<sub>12</sub>] in THF 21 °C.

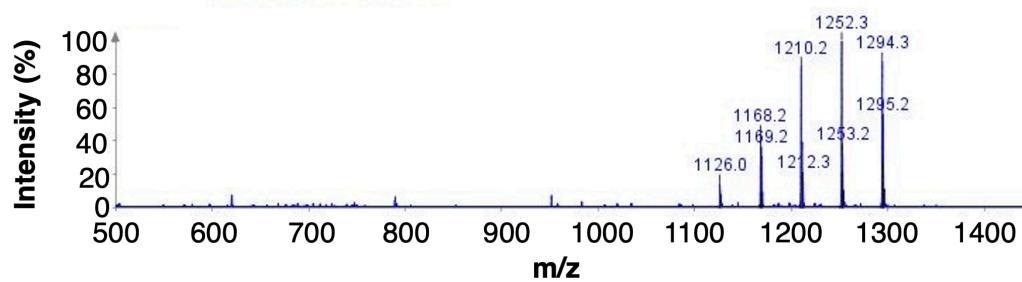

**Figure S3.** ESI-MS(-ve) of 1-butyl,  $[\text{nBu}_4\text{N}][\text{V}_6\text{O}_7(\text{OC}_4\text{H}_9)_{12-x}(\text{OCH}_3)_x]$  ( $x = 0, 1, 2, 3, 4$ ).

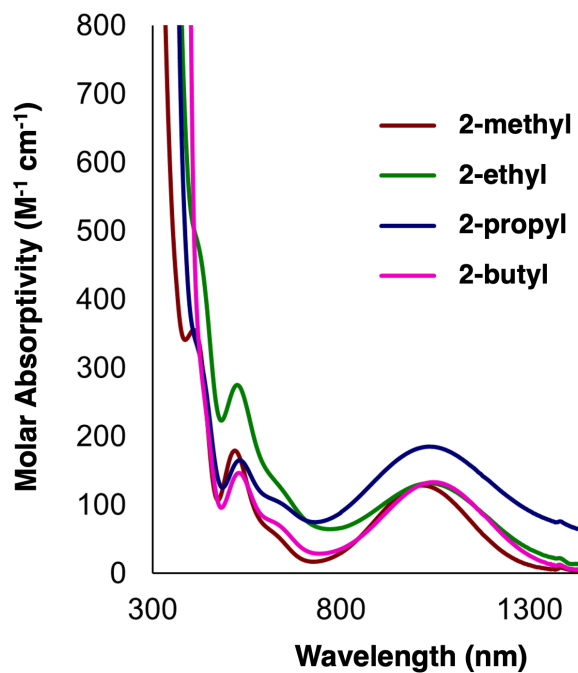

**Figure S4.** Electronic absorption spectra of 2-methyl, 2-ethyl, 2-propyl and 2-butyl in acetonitrile at 21 °C

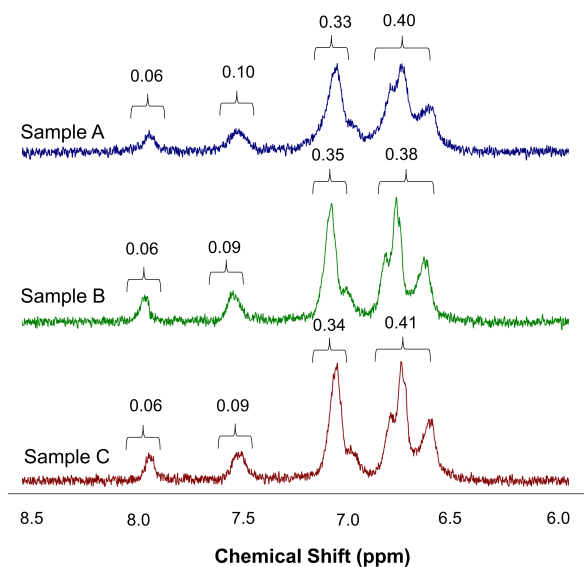

**Figure S5.**  $^1\text{H}$  NMR spectra of equilibrium reaction solutions with **1-methyl** and Hydz after 6 hours in  $\text{THF-}d_8$  at 21  $^\circ\text{C}$ .

**Table S1.**  $\text{BDFE}(\text{O-H})_{\text{adj}}$  calculated from equilibrium reactions of **1-methyl** with Hydz after 6 hours using the equation outlined in the Experimental section.

| Trial | Hydz           |                             |                |                             |             | Azobenzene <sup>b</sup> |                             |                |                             | Avg. Conc.   | $\text{BDFE}_{\text{adj}}$ (kcal/mol) |
|-------|----------------|-----------------------------|----------------|-----------------------------|-------------|-------------------------|-----------------------------|----------------|-----------------------------|--------------|---------------------------------------|
|       | 7.16 ppm (4 H) |                             | 6.77 ppm (6 H) |                             | Avg. Conc.  | 7.91 ppm (4 H)          |                             | 7.58 ppm (6 H) |                             |              |                                       |
|       | Integral       | Relative Conc. <sup>a</sup> | Integral       | Relative Conc. <sup>a</sup> |             | Integral                | Relative Conc. <sup>a</sup> | Integral       | Relative Conc. <sup>a</sup> |              |                                       |
| A     | 0.33           | 0.08                        | 0.40           | 0.07                        | <b>0.08</b> | 0.06                    | 0.02                        | 0.10           | 0.02                        | <b>0.02</b>  | <b>59.9</b>                           |
| B     | 0.35           | 0.09                        | 0.38           | 0.06                        | <b>0.08</b> | 0.06                    | 0.02                        | 0.09           | 0.02                        | <b>0.02</b>  | <b>59.9</b>                           |
| C     | 0.34           | 0.09                        | 0.41           | 0.07                        | <b>0.08</b> | 0.06                    | 0.02                        | 0.09           | 0.02                        | <b>0.02</b>  | <b>59.9</b>                           |
|       |                |                             |                |                             |             |                         |                             |                |                             | <b>Avg.</b>  | <b>59.9</b>                           |
|       |                |                             |                |                             |             |                         |                             |                |                             | <b>Error</b> | <b>0.1</b>                            |

<sup>a</sup> Relative concentration of either Hydz or azobenzene was determined by dividing the integral by the number of protons a given signal(s) corresponds with.

<sup>b</sup> Integration of the N-H resonance of Hydz was omitted in this study due to potential broadening of the resonance by H-bonding with  $2\text{-V}_6\text{O}_8^{2-}$ .

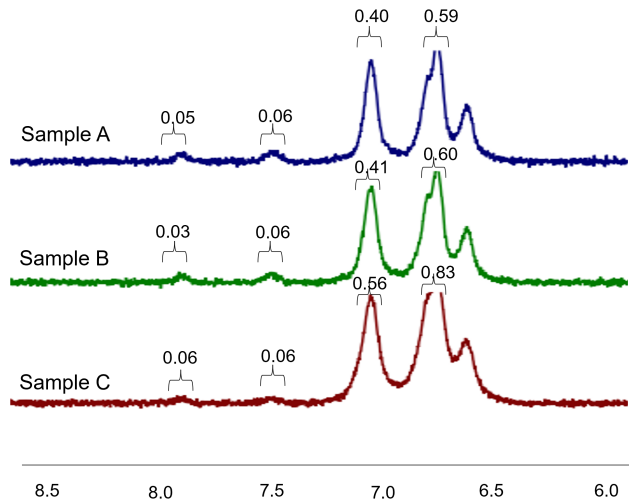

**Figure S6.**  $^1\text{H}$  NMR spectra of equilibrium reaction solutions with **1-ethyl** and Hydz after 7 days in  $\text{THF-}d_8$  at  $21\text{ }^\circ\text{C}$ .

**Table S2.**  $\text{BDFE}(\text{O-H})_{\text{adj}}$  calculated from equilibrium reactions of **1-ethyl** with Hydz after 7 days using the equation outlined in the Experimental section.

| Trial | Hydz           |                             |                |                             |             | Azobenzene <sup>b</sup> |                             |                |                             | Avg. Conc.   | $\text{BDFE}_{\text{adj}}$ (kcal/mol) |
|-------|----------------|-----------------------------|----------------|-----------------------------|-------------|-------------------------|-----------------------------|----------------|-----------------------------|--------------|---------------------------------------|
|       | 7.16 ppm (4 H) |                             | 6.77 ppm (6 H) |                             | Avg. Conc.  | 7.91 ppm (4 H)          |                             | 7.58 ppm (6 H) |                             |              |                                       |
|       | Integral       | Relative Conc. <sup>a</sup> | Integral       | Relative Conc. <sup>a</sup> |             | Integral                | Relative Conc. <sup>a</sup> | Integral       | Relative Conc. <sup>a</sup> |              |                                       |
| A     | 0.40           | 0.10                        | 0.59           | 0.01                        | <b>0.09</b> | 0.05                    | 0.01                        | 0.06           | 0.01                        | <b>0.01</b>  | <b>59.8</b>                           |
| B     | 0.41           | 0.10                        | 0.60           | 0.10                        | <b>0.10</b> | 0.03                    | 0.01                        | 0.06           | 0.01                        | <b>0.01</b>  | <b>59.7</b>                           |
| C     | 0.56           | 0.14                        | 0.83           | 0.14                        | <b>0.14</b> | 0.06                    | 0.02                        | 0.06           | 0.02                        | <b>0.01</b>  | <b>59.7</b>                           |
|       |                |                             |                |                             |             |                         |                             |                |                             | <b>Avg.</b>  | <b>59.7</b>                           |
|       |                |                             |                |                             |             |                         |                             |                |                             | <b>Error</b> | <b>0.1</b>                            |

<sup>a</sup> Relative concentration of either Hydz or azobenzene was determined by dividing the integral by the number of protons a given signal(s) corresponds with.

<sup>b</sup> Integration of the N-H resonance of Hydz was omitted in this study due to potential broadening of the resonance by H-bonding with  $2\text{-V}_6\text{O}_8^{2-}$ .

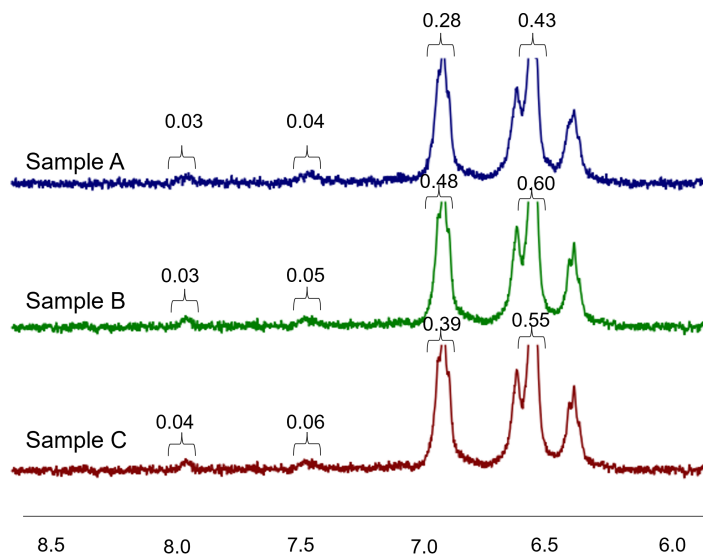

**Figure S7.**  $^1\text{H}$  NMR spectra of equilibrium reaction solutions with **1-propyl** and Hydz after 7 days in  $\text{THF-}d_8$  at  $21\text{ }^\circ\text{C}$ .

**Table S3.**  $\text{BDFE}(\text{O-H})_{\text{adj}}$  calculated from equilibrium reactions of **1-propyl** with Hydz after 7 days using the equation outlined in the Experimental section.

| Trial | Hydz           |                             |                |                             |             | Azobenzene <sup>b</sup> |                             |                |                             | Avg. Conc.   | BDFE <sub>adj</sub> (kcal/mol) |
|-------|----------------|-----------------------------|----------------|-----------------------------|-------------|-------------------------|-----------------------------|----------------|-----------------------------|--------------|--------------------------------|
|       | 7.16 ppm (4 H) |                             | 6.77 ppm (6 H) |                             | Avg. Conc.  | 7.91 ppm (4 H)          |                             | 7.58 ppm (6 H) |                             |              |                                |
|       | Integral       | Relative Conc. <sup>a</sup> | Integral       | Relative Conc. <sup>a</sup> |             | Integral                | Relative Conc. <sup>a</sup> | Integral       | Relative Conc. <sup>a</sup> |              |                                |
| A     | 0.28           | 0.07                        | 0.43           | 0.07                        | <b>0.07</b> | 0.03                    | 0.01                        | 0.04           | 0.01                        | <b>0.01</b>  | <b>59.7</b>                    |
| B     | 0.41           | 0.10                        | 0.60           | 0.10                        | <b>0.10</b> | 0.03                    | 0.01                        | 0.05           | 0.01                        | <b>0.01</b>  | <b>59.6</b>                    |
| C     | 0.39           | 0.10                        | 0.55           | 0.09                        | <b>0.09</b> | 0.04                    | 0.01                        | 0.06           | 0.01                        | <b>0.01</b>  | <b>59.7</b>                    |
|       |                |                             |                |                             |             |                         |                             |                |                             | <b>Avg.</b>  | <b>59.7</b>                    |
|       |                |                             |                |                             |             |                         |                             |                |                             | <b>Error</b> | <b>0.1</b>                     |

<sup>a</sup> Relative concentration of either Hydz or azobenzene was determined by dividing the integral by the number of protons a given signal(s) corresponds with.

<sup>b</sup> Integration of the N-H resonance of Hydz was omitted in this study due to potential broadening of the resonance by H-bonding with  $2\text{-V}_6\text{O}_8^2$ .

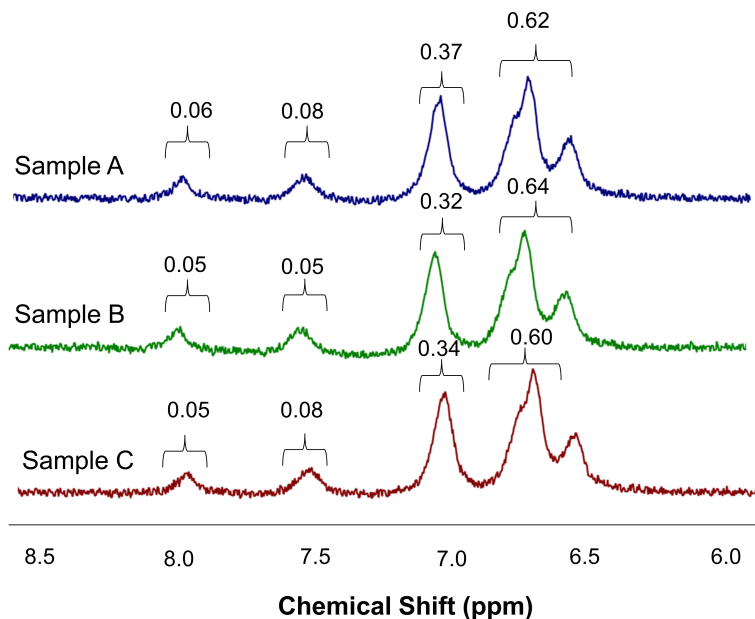

**Figure S8.**  $^1\text{H}$  NMR spectra of equilibrium reaction solutions with **1-butyl** and Hydz after 7 days in  $\text{THF-}d_8$  at  $21\text{ }^\circ\text{C}$ .

**Table S4.**  $\text{BDFE}(\text{O-H})_{\text{adj}}$  calculated from equilibrium reactions of **1-butyl** with Hydz after 7 days using the equation outlined in the Experimental section

| Trial | Hydz           |                             |                |                             |             | Azobenzene <sup>b</sup> |                             |                |                             | Avg. Conc.   | BDFE <sub>adj</sub> (kcal/mol) |
|-------|----------------|-----------------------------|----------------|-----------------------------|-------------|-------------------------|-----------------------------|----------------|-----------------------------|--------------|--------------------------------|
|       | 7.16 ppm (4 H) |                             | 6.77 ppm (6 H) |                             | Avg. Conc.  | 7.91 ppm (4 H)          |                             | 7.58 ppm (6 H) |                             |              |                                |
|       | Integral       | Relative Conc. <sup>a</sup> | Integral       | Relative Conc. <sup>a</sup> |             | Integral                | Relative Conc. <sup>a</sup> | Integral       | Relative Conc. <sup>a</sup> |              |                                |
| A     | 0.34           | 0.09                        | 0.60           | 0.10                        | <b>0.09</b> | 0.05                    | 0.01                        | 0.08           | 0.01                        | <b>0.01</b>  | <b>59.8</b>                    |
| B     | 0.32           | 0.08                        | 0.64           | 0.11                        | <b>0.09</b> | 0.04                    | 0.01                        | 0.05           | 0.01                        | <b>0.01</b>  | <b>59.8</b>                    |
| C     | 0.37           | 0.09                        | 0.62           | 0.10                        | <b>0.10</b> | 0.06                    | 0.02                        | 0.08           | 0.01                        | <b>0.01</b>  | <b>59.8</b>                    |
|       |                |                             |                |                             |             |                         |                             |                |                             | <b>Avg.</b>  | <b>59.8</b>                    |
|       |                |                             |                |                             |             |                         |                             |                |                             | <b>Error</b> | <b>0.1</b>                     |

<sup>a</sup> Relative concentration of either Hydz or azobenzene was determined by dividing the integral by the number of protons a given signal(s) corresponds with.

<sup>b</sup> Integration of the N-H resonance of Hydz was omitted in this study due to potential broadening of the resonance by H-bonding with  $2\text{-V}_6\text{O}_8^{2-}$ .



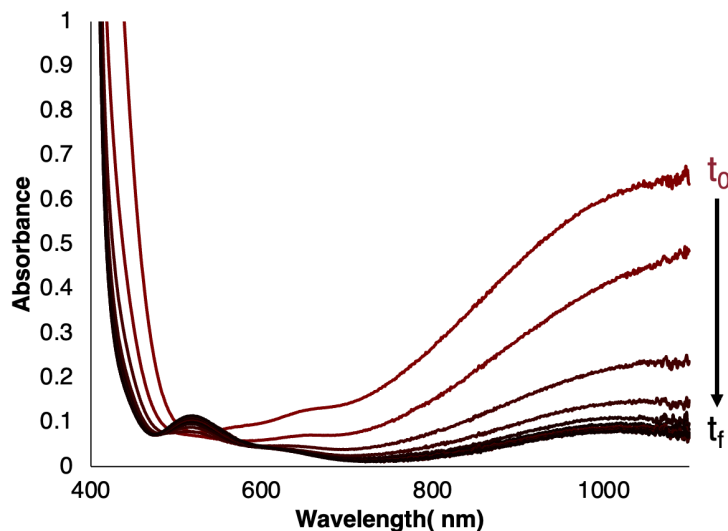

**Figure S9.** Scanning Kinetics for the reaction between **1-methyl** (0.6 mM) and H<sub>2</sub>Phen (8 mM) recorded in acetonitrile at 25 °C. Red is initial spectrum of **1-methyl** ( $t_0 = 0$  min), color of trace darkens as reaction progresses ending in the black trace ( $t_f = 120$  min).

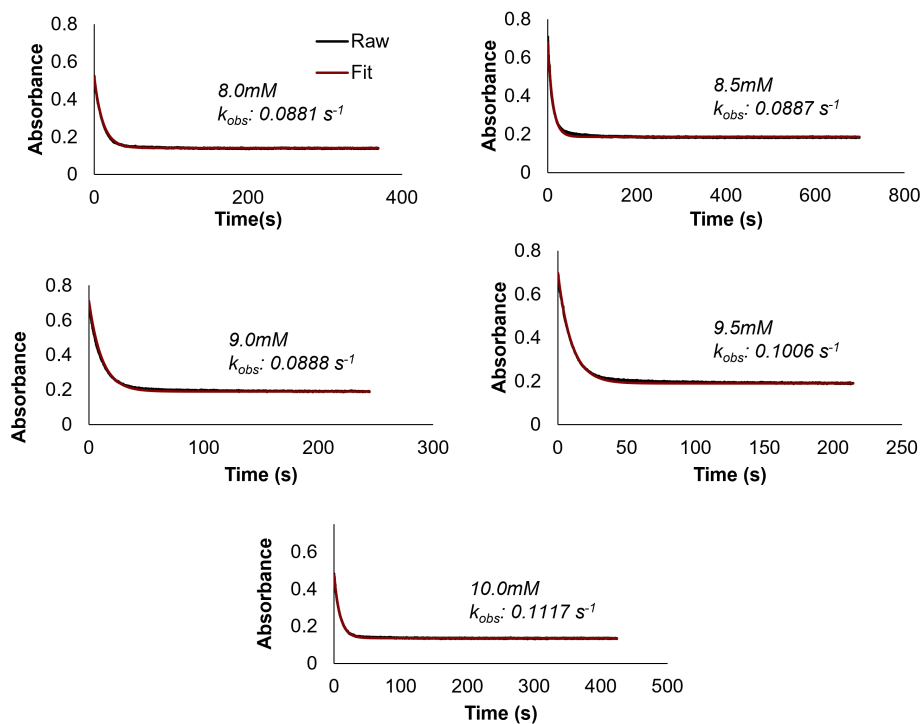

**Figure S10.** Plots of absorbance at 1025 nm vs. time for the reaction between **1-methyl** (0.6 mM) and excess H<sub>2</sub>Phen under pseudo first-order reaction conditions recorded in acetonitrile at 25 °C.

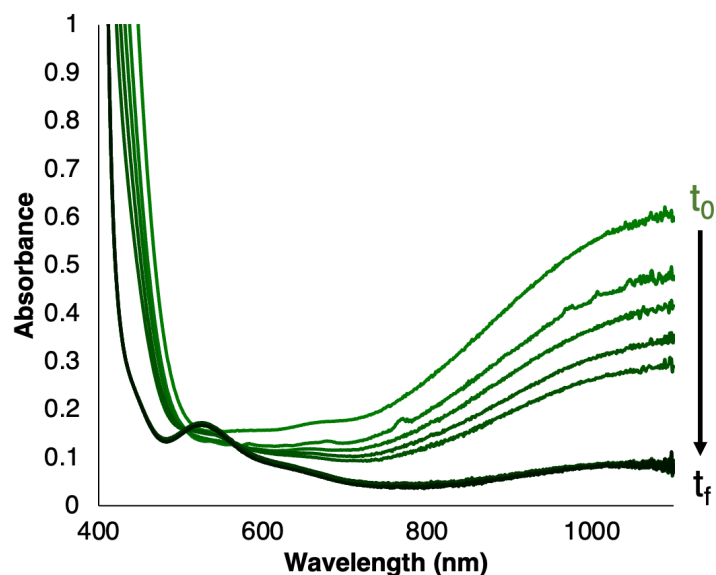

**Figure S11.** Scanning Kinetics for the reaction between **1-ethyl** (0.6 mM) and H<sub>2</sub>Phen (8 mM) recorded in acetonitrile at 25 °C. Green is initial spectrum of **1-ethyl** ( $t_0 = 0$  min), color of trace darkens as reaction progresses ending in the black trace ( $t_f = 120$  min).

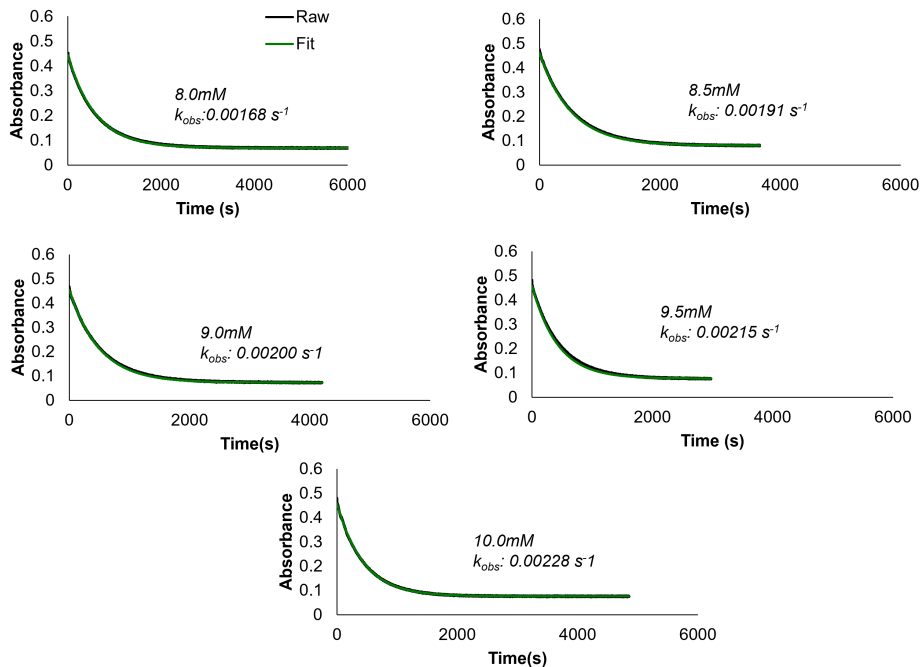

**Figure S12.** Plots of absorbance at 1025 nm vs. time for the reaction between **1-ethyl** (0.6 mM) and excess H<sub>2</sub>Phen under pseudo first-order reaction conditions recorded in acetonitrile at 25 °C.

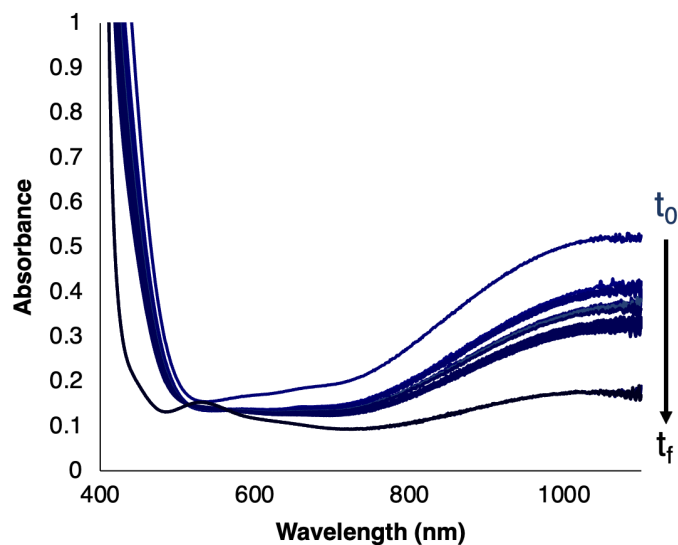

**Figure S13.** Scanning Kinetics for the reaction between **1-propyl** (0.6 mM) and H<sub>2</sub>Phen (8 mM) recorded in acetonitrile at 25 °C. Dark blue is initial spectrum of **1-propyl** ( $t_0 = 0$  min), color of trace darkens as reaction progresses ending in the black trace ( $t_f = 120$  min).

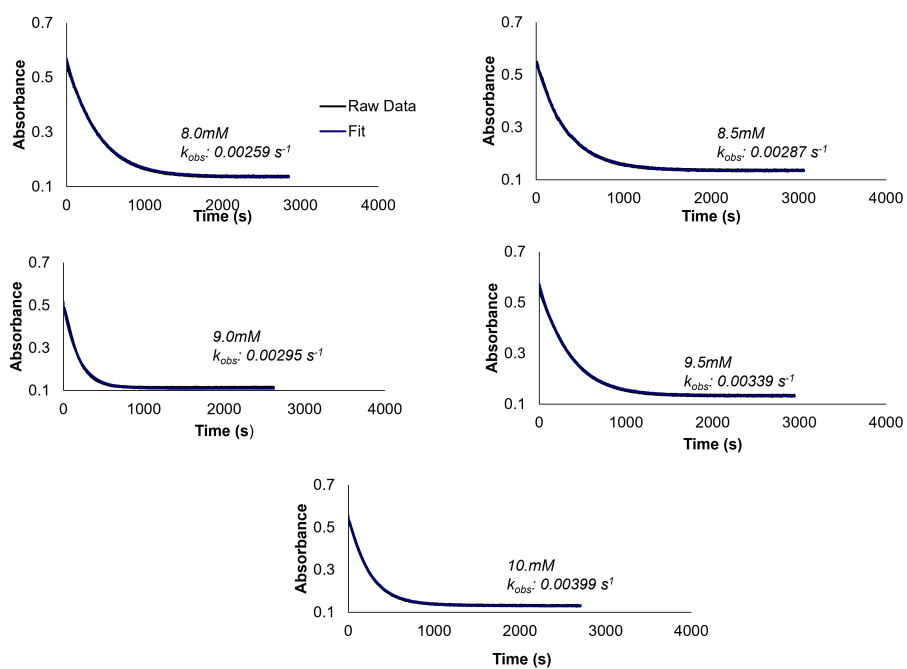

**Figure S14.** Plots of absorbance at 1025 nm vs. time for the reaction between **1-propyl** (0.6 mM) and excess H<sub>2</sub>Phen under pseudo first-order reaction conditions recorded in acetonitrile at 25 °C

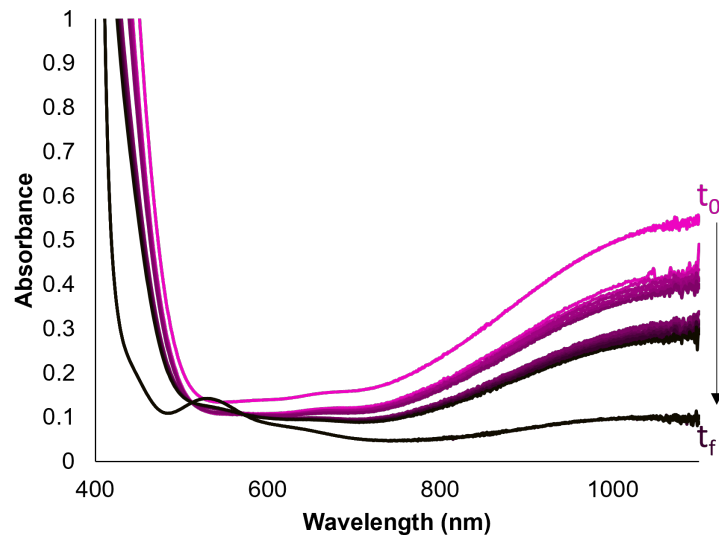

**Figure S15.** Scanning Kinetics for the reaction between **1-propyl** (0.6 mM) and H<sub>2</sub>Phen (8 mM) recorded in acetonitrile at 25 °C. Dark blue is initial spectrum of **1-propyl** ( $t_0 = 0$  min), color of trace darkens as reaction progresses ending in the black trace ( $t_f = 120$  min).

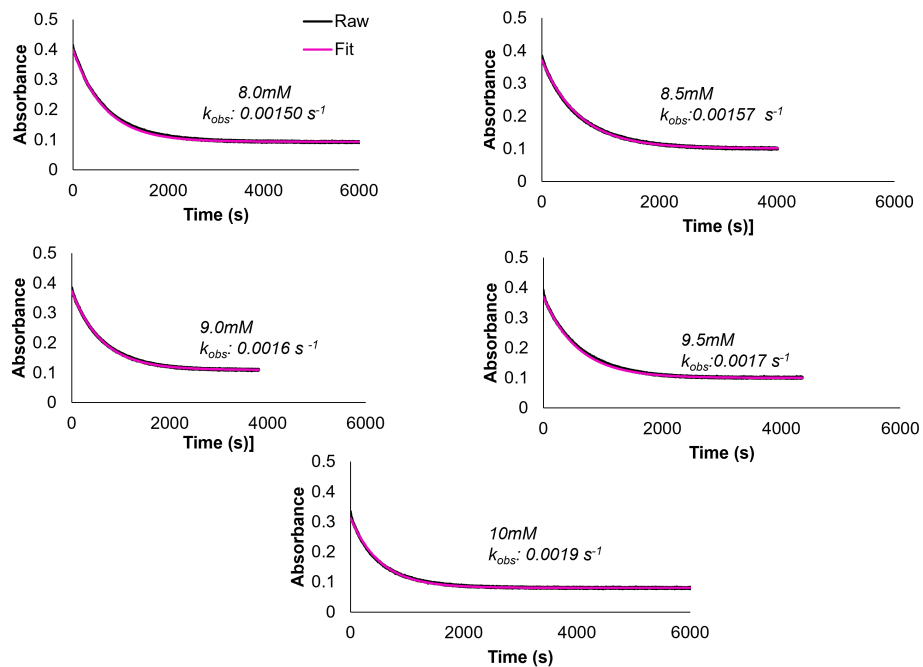

**Figure S16.** Plots of absorbance at 1025 nm vs. time for the reaction between **1-butyl** (0.6 mM) and excess H<sub>2</sub>Phen under pseudo first-order reaction conditions recorded in acetonitrile at 25 °C.

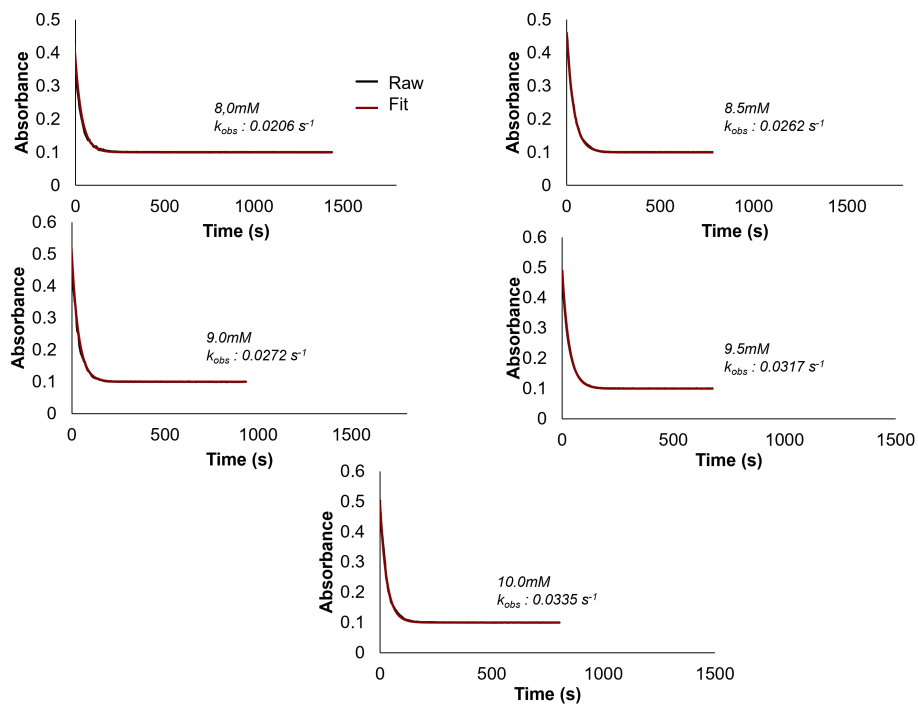

**Figure S17.** Plots of absorbance at 1025 nm vs. time for the reaction between **1-methyl** (0.6 mM) and excess D<sub>2</sub>Phen under pseudo first-order reaction conditions recorded in acetonitrile at 25 °C.

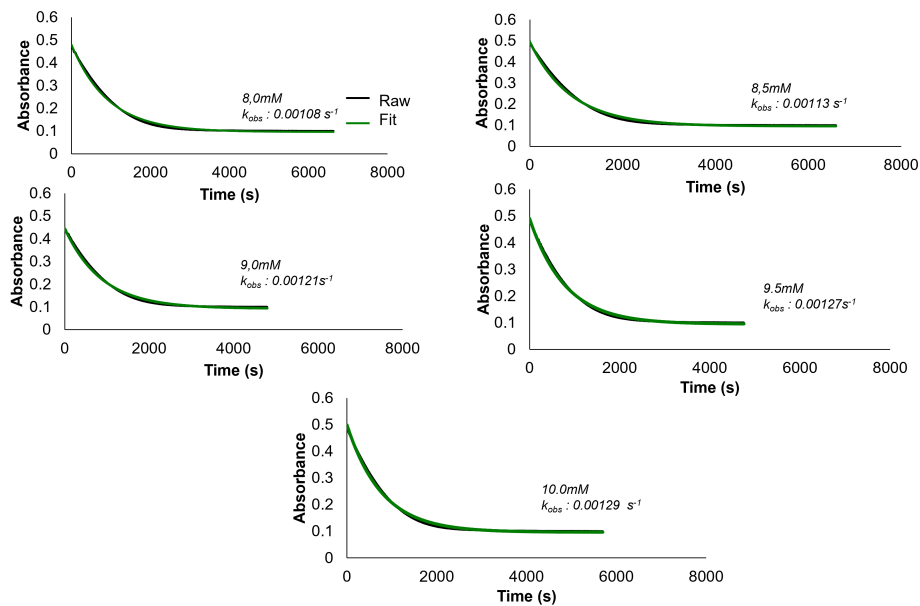

**Figure S18.** Plots of absorbance at 1025 nm vs. time for the reaction between **1-ethyl** (0.6 mM) and excess D<sub>2</sub>Phen under pseudo first-order reaction conditions recorded in acetonitrile at 25 °C

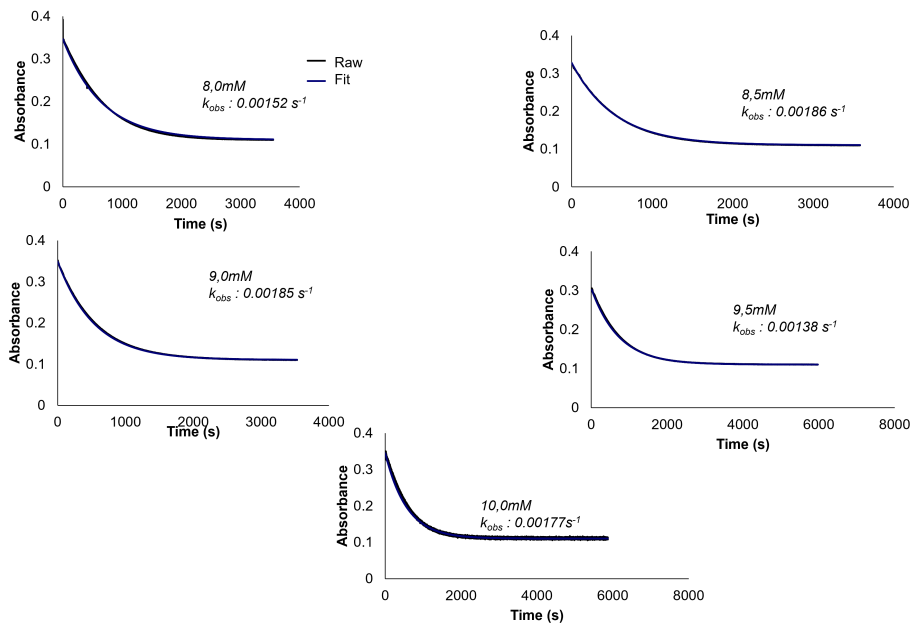

**Figure S19.** Plots of absorbance at 1025 nm vs. time for the reaction between **1-propyl** (0.6 mM) and excess D<sub>2</sub>Phen under pseudo first-order reaction conditions recorded in acetonitrile at 25 °C.

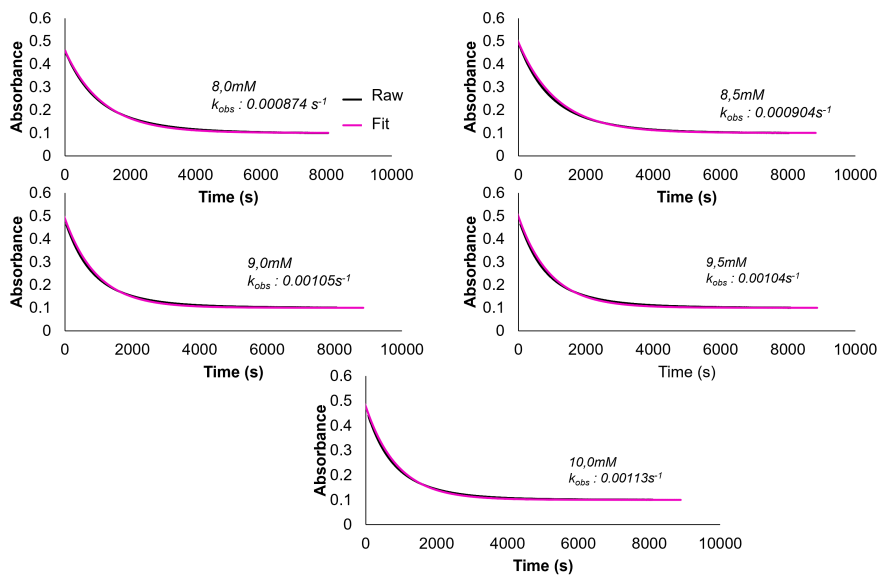

**Figure S20.** Plots of absorbance at 1025 nm vs. time for the reaction between **1-butyl** (0.6 mM) and excess D<sub>2</sub>Phen under pseudo first-order reaction conditions recorded in acetonitrile at 25 °C.

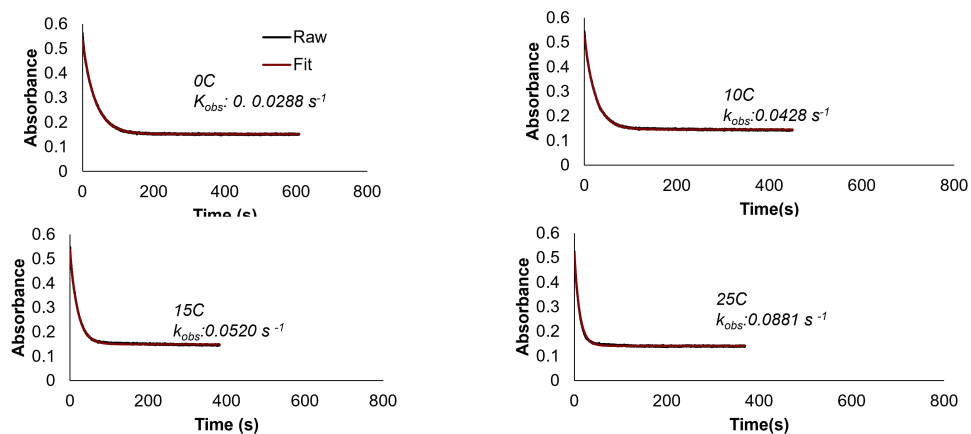

**Figure S21.** Plots of absorbance at 1025 nm vs. time for the reaction between **1-methyl** (0.6 mM) and H<sub>2</sub>Phen (8 mM) recorded in acetonitrile between 0 °C and 35 °C.

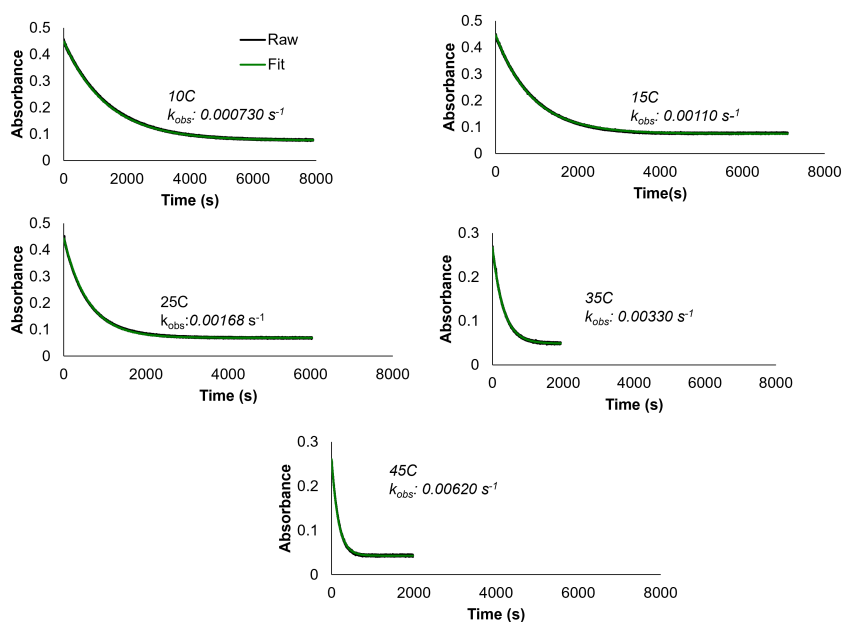

**Figure S22.** Plots of absorbance at 1025 nm vs. time for the reaction between **1-ethyl** (0.6 mM) and H<sub>2</sub>Phen (8 mM) recorded in acetonitrile between 10 °C and 45 °C.

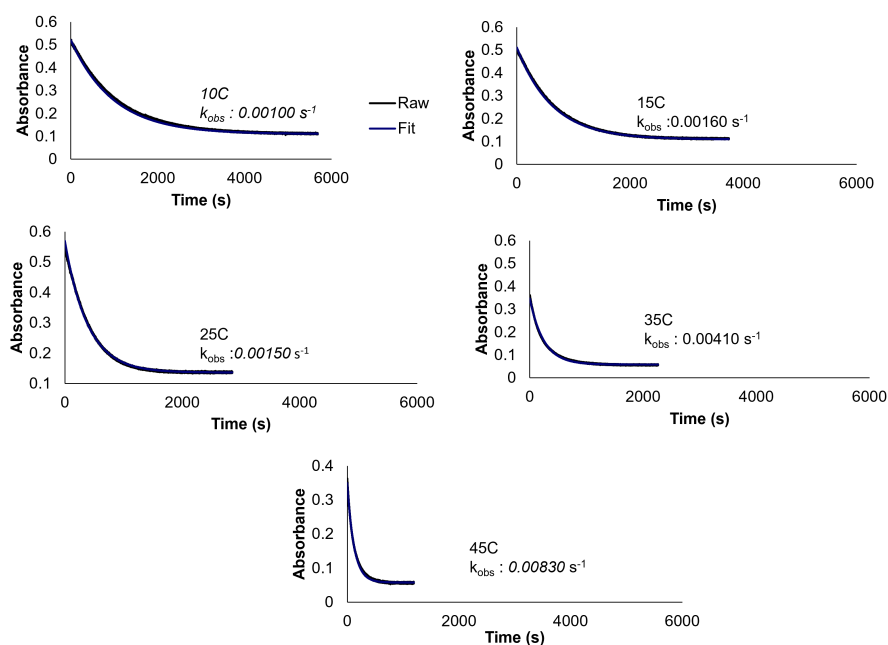

**Figure S23.** Plots of absorbance at 1025 nm vs. time for the reaction between **1-propyl** (0.6 mM) and H<sub>2</sub>Phen (8 mM) recorded in acetonitrile between 10 °C and 45 °C.

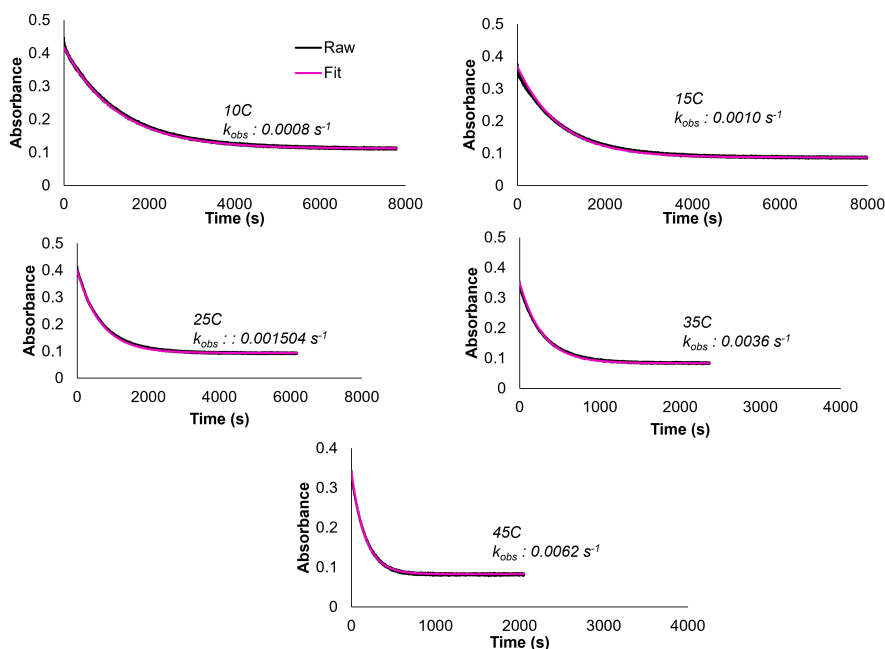

**Figure S24.** Plots of absorbance at 1025 nm vs. time for the reaction between **1-butyl** (0.6 mM) and H<sub>2</sub>Phen (8 mM) recorded in acetonitrile between 10 °C and 45 °C.
